# Supplementary material for: Survival outcomes of salvage surgery in the watch-and-wait approach for rectal cancer with clinical complete response after neoadjuvant chemoradiotherapy: a systematic review and meta-analysis
Source: PubMed Central journal article supplement — Ann Coloproctol. 2021 Dec 28;39(6):447–56. doi: 10.3393/ac.2022.01221.0174 (PMC10781598; doi:10.3393/ac.2022.01221.0174), 2021-12-28
Supplement: ac-2022-01221-0174-Supplementary-Fig-2.pdf [file ac-2022-01221-0174-Supplementary-Fig-2.pdf]

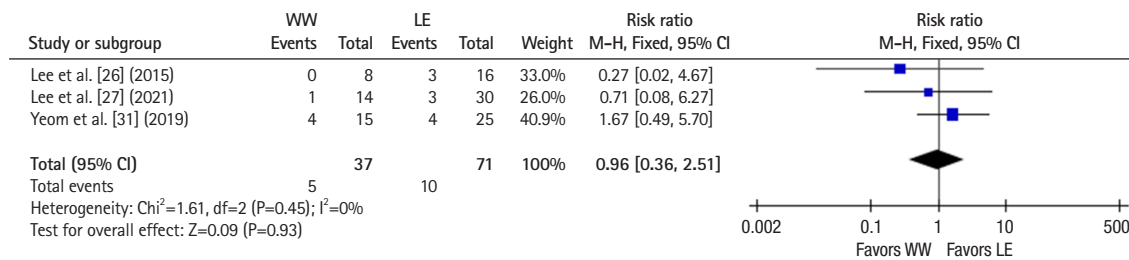

**Supplementary Fig. 2.** Forest plot depicting distant metastasis of wait-and-watch (WW) group versus local excision (LE) group. M-H, Mantel-Haenszel test; CI, confidence interval.
