# Supplementary material for: Survival outcomes of salvage surgery in the watch-and-wait approach for rectal cancer with clinical complete response after neoadjuvant chemoradiotherapy: a systematic review and meta-analysis
Source: PubMed Central journal article supplement — Ann Coloproctol. 2021 Dec 28;39(6):447–56. doi: 10.3393/ac.2022.01221.0174 (PMC10781598; doi:10.3393/ac.2022.01221.0174), 2021-12-28
Supplement: ac-2022-01221-0174-Supplementary-Table-1.pdf [file ac-2022-01221-0174-Supplementary-Table-1.pdf]

**Supplementary Table 1.** Summary of limitations of previous studies

| Study (meta-analysis)                                 | Comparator      |
|-------------------------------------------------------|-----------------|
| Yu et al. [32] (2021)                                 |                 |
| Included studies that does not have cCR as comparator | pCR             |
| Habr-Gama et al. [14] (2004)                          |                 |
| Maas et al. [33] (2011)                               |                 |
| Smith and Garcia-Aguilar [36] (2015)                  |                 |
| Studies not included                                  | cCR             |
| Beard et al. [22] (2020)                              |                 |
| Han et al. [24] (2021)                                |                 |
| Lee et al. [26] (2015)                                |                 |
| Zhao et al. [18] (2020)                               |                 |
| Included studies that does not have cCR as comparator |                 |
| Habr-Gama et al. [14] (2004)                          | pCR             |
| Maas et al. [33] (2011)                               | pCR             |
| Smith et al. [34] (2012)                              | pCR             |
| Renehan [35] (2016)                                   | Matched non-cCR |
| Studies not included                                  | cCR             |
| Han et al. [24] (2021)                                |                 |
| Wang et al. [30] (2021)                               |                 |

cCR, complete clinical response; pCR, pathologic complete response.
